# Supplementary material for: Taxes, start-up costs, and innovative entrepreneurship
Source: Springer Nature journal article supplement (doi:10.1007/s11187-018-0005-9), 2018-03-03
Supplement: MOESM1 [file 15506180]

# Taxes, Start-up Costs, and Innovative Entrepreneurship

## Small Business Economics

Pourya Darnihamedani, Joern Hendrich Block, Jolanda Hessels, Aram Simonyan

**Table A.1.** Sample of individuals and the value of dependent variable by country

| Country        | Total sample of individuals | Share of innovative entrepreneurs in total sample of individuals (min, max, standard deviation) | Share of entrepreneurs in total sample of individuals | Share of innovative entrepreneurs in total sample of entrepreneurs |
|----------------|-----------------------------|-------------------------------------------------------------------------------------------------|-------------------------------------------------------|--------------------------------------------------------------------|
| Argentina      | 7,732                       | (0.15, 0.29, 0.05)                                                                              | 13.63%                                                | 22.79%                                                             |
| Australia      | 7,330                       | (0.09, 0.14, 0.02)                                                                              | 9.65%                                                 | 11.74%                                                             |
| Austria        | 2,253                       | (0.08, 0.16, 0.04)                                                                              | 7.68%                                                 | 10.40%                                                             |
| Belgium        | 12,203                      | (0.10, 0.19, 0.04)                                                                              | 4.77%                                                 | 14.67%                                                             |
| Brazil         | 12,041                      | (0.02, 0.14, 0.03)                                                                              | 15.42%                                                | 4.94%                                                              |
| Canada         | 1,202                       | (0.15, 0.18, 0.01)                                                                              | 9.82%                                                 | 14.41%                                                             |
| Chile          | 16,817                      | (0.23, 0.50, 0.10)                                                                              | 15.49%                                                | 41.78%                                                             |
| China          | 10,385                      | (0.09, 0.21, 0.04)                                                                              | 19.37%                                                | 13.82%                                                             |
| Colombia       | 18,489                      | (0.17, 0.41, 0.08)                                                                              | 18.21%                                                | 23.21%                                                             |
| Croatia        | 7,213                       | (0.064, 0.14, 0.02)                                                                             | 9.47%                                                 | 10.40%                                                             |
| Czech republic | 1,829                       | (0.10, 0.10, 0)                                                                                 | 6.56%                                                 | 10.00%                                                             |
| Denmark        | 19,317                      | (0.19, 0.28, 0.03)                                                                              | 5.39%                                                 | 24.24%                                                             |
| Finland        | 8,820                       | (0.09, 0.15, 0.018)                                                                             | 8.56%                                                 | 12.45%                                                             |
| France         | 10,877                      | (0.03, 0.14, 0.03)                                                                              | 3.33%                                                 | 9.18%                                                              |
| Germany        | 23,199                      | (0.07, 0.13, 0.02)                                                                              | 7.61%                                                 | 10.72%                                                             |
| Greece         | 9,947                       | (0.059, 0.25, 0.06)                                                                             | 8.87%                                                 | 15.93%                                                             |
| Hong Kong      | 2,661                       | (0.00, 0.20, 0.08)                                                                              | 8.72%                                                 | 8.19%                                                              |
| Hungary        | 11,364                      | (0.01, 0.09, 0.03)                                                                              | 7.60%                                                 | 5.27%                                                              |
| Iceland        | 8,997                       | (0.11, 0.21, 0.03)                                                                              | 14.93%                                                | 15.79%                                                             |
| India          | 3,562                       | (0.07, 0.34, 0.12)                                                                              | 13.62%                                                | 17.01%                                                             |
| Indonesia      | 1,432                       | (0.24, 0.24, 0)                                                                                 | 22.97%                                                | 26.14%                                                             |
| Ireland        | 7,951                       | (0.10, 0.21, 0.04)                                                                              | 9.96%                                                 | 14.77%                                                             |
| Israel         | 6,854                       | (0.17, 0.22, 0.02)                                                                              | 7.57%                                                 | 20.27%                                                             |
| Italy          | 10,744                      | (0.06, 0.33, 0.07)                                                                              | 4.45%                                                 | 16.74%                                                             |
| Japan          | 7,939                       | (0.04, 0.27, 0.07)                                                                              | 5.08%                                                 | 11.41%                                                             |
| Jordan         | 3,053                       | (0.22, 0.39, 0.08)                                                                              | 17.95%                                                | 33.94%                                                             |
| Kazakhstan     | 1,315                       | (0.03, 0.03, 0)                                                                                 | 13.31%                                                | 2.86%                                                              |
| Korea          | 3,751                       | (0.05, 0.12, 0.03)                                                                              | 12.02%                                                | 10.20%                                                             |
| Latvia         | 8,875                       | (0.08, 0.22, 0.05)                                                                              | 8.77%                                                 | 11.70%                                                             |
| Malaysia       | 4,349                       | (0.04, 0.11, 0.03)                                                                              | 8.09%                                                 | 8.16%                                                              |
| Mexico         | 8,811                       | (0.1, 0.18, 0.03)                                                                               | 8.52%                                                 | 13.21%                                                             |
| Netherlands    | 16,158                      | (0.12, 0.25, 0.03)                                                                              | 6.14%                                                 | 19.22%                                                             |
| New Zealand    | 1,920                       | (0.08, 0.16, 0.04)                                                                              | 19.38%                                                | 13.10%                                                             |
| Norway         | 9,652                       | (0.04, 0.16, 0.03)                                                                              | 8.20%                                                 | 11.30%                                                             |
| Peru           | 8,958                       | (0.22, 0.36, 0.05)                                                                              | 34.29%                                                | 28.75%                                                             |
| Philippines    | 1,715                       | (0.08, 0.08, 0)                                                                                 | 24.43%                                                | 7.88%                                                              |

|                      |                |                    |        |        |
|----------------------|----------------|--------------------|--------|--------|
| Poland               | 2,053          | (0.10, 0.22, 0.06) | 8.43%  | 11.48% |
| Portugal             | 3,175          | (0.06, 0.13, 0.03) | 8.98%  | 11.23% |
| Romania              | 6,708          | (0.02, 0.11, 0.03) | 3.44%  | 8.65%  |
| Russia               | 7,135          | (0.12, 0.23, 0.04) | 2.55%  | 16.71% |
| Singapore            | 7,327          | (0.14, 0.18, 0.02) | 8.75%  | 15.76% |
| Slovenia             | 12,830         | (0.15, 0.24, 0.03) | 6.72%  | 16.59% |
| South Africa         | 8,981          | (0.16, 0.29, 0.04) | 8.90%  | 23.28% |
| Spain                | 163,679        | (0.11, 0.21, 0.04) | 5.96%  | 17.40% |
| Sweden               | 34,579         | (0.07, 0.16, 0.04) | 3.10%  | 10.15% |
| Switzerland          | 9,292          | (0.11, 0.17, 0.02) | 6.60%  | 14.93% |
| Taiwan               | 1,766          | (0.44, 0.44, 0)    | 8.83%  | 45.51% |
| Thailand             | 5,881          | (0.11, 0.20, 0.03) | 16.44% | 14.24% |
| Turkey               | 6,111          | (0.34, 0.41, 0.03) | 8.18%  | 39.08% |
| UK                   | 95,337         | (0.08, 0.17, 0.03) | 6.98%  | 11.60% |
| United Arab Emirates | 4,612          | (0.26, 0.45, 0.09) | 10.36% | 13.56% |
| United States        | 17,648         | (0.11, 0.17, 0.02) | 9.38%  | 36.40% |
| Venezuela            | 2,570          | (0.08, 0.15, 0.03) | 21.09% | 9.41%  |
| <b>Total</b>         | <b>689,399</b> |                    |        |        |

**Table A.2.** The value of the independent variables by country

| Country (time range in sample) | Start-up costs (min, max, standard deviation) | Corporate tax rate (min, max, standard deviation) | Income tax rate (min, max, standard deviation) |
|--------------------------------|-----------------------------------------------|---------------------------------------------------|------------------------------------------------|
| Argentina (2004-2011)          | (9, 14.7, 1.80)                               | (35, 35, 0)                                       | (13, 17, 1.66)                                 |
| Australia (2004-2011)          | (0.8, 2.1, 0.48)                              | (30, 30, 0)                                       | (47, 47, 0)                                    |
| Austria (2005-2007)            | (5.6, 6, 0.2)                                 | (25, 25, 0)                                       | (24, 27, 1.5)                                  |
| Belgium (2004-2011)            | (5.2, 11.3, 2.88)                             | (34, 34, 0)                                       | (53.7, 53.7, 0)                                |
| Brazil (2004-2011)             | (6.9, 13.1, 2.05)                             | (25, 25, 0)                                       | (27, 27, 0)                                    |
| Canada (2004-2006)             | (0.6, 0.9, 0.14)                              | (36, 41, 2.16)                                    | (29, 29, 0)                                    |
| Chile (2005-2011)              | (8.6, 12.1, 0.99)                             | (17, 35, 6.21)                                    | (19, 20, 0.35)                                 |
| China (2005-2010)              | (4.9, 15.9, 3.89)                             | (25, 33, 3.92)                                    | (45, 45, 0)                                    |
| Colombia (2006-2011)           | (13.1, 28, 5.19)                              | (33, 38, 1.83)                                    | (33, 33, 0)                                    |
| Croatia (2004-2010)            | (8.4, 16.3, 2.40)                             | (20, 20, 0)                                       | (45, 45, 0)                                    |
| Czech republic (2006)          | (9.5, 9.5, 0)                                 | (24, 24, 0)                                       | (20, 20, 0)                                    |
| Denmark (2004-2011)            | (0, 0, 0)                                     | (25, 30, 2.18)                                    | (31, 31, 0)                                    |
| Finland (2004-2010)            | (0.9, 1.2, 0.10)                              | (26, 29, 1.36)                                    | (26, 30, 1.25)                                 |
| France (2004-2011)             | (0.9, 1.3, 0.13)                              | (33.3, 35.4, 0.74)                                | (45, 53.7, 2.92)                               |
| Germany (2004-2011)            | (4.7, 5.9, 0.51)                              | (31, 43, 4.77)                                    | (42, 47.5, 2.48)                               |
| Greece (2004-2011)             | (20.2, 32.7, 5.43)                            | (20.00, 35.00, 5.02)                              | (40.00, 45.00, 2.17)                           |
| Hong Kong (2004-2009)          | (2, 3.30, 0.54)                               | (16, 18, 0.94)                                    | (5, 5, 0)                                      |
| Hungary (2004-2011)            | (8, 40.40, 11.59)                             | (16, 20, 1.58)                                    | (37, 37, 0)                                    |
| Iceland (2004-2010)            | (3.1, 3.1, 0)                                 | (15, 26, 4.84)                                    | (13, 38, 8.56)                                 |
| India (2006-2008)              | (62, 78.40, 7.01)                             | (34, 34, 0)                                       | (12, 12, 0)                                    |
| Indonesia (2006)               | (101.7, 101.7, 0)                             | (30, 30, 0)                                       | (2, 2, 0)                                      |
| Ireland (2004-2010)            | (0.30, 10.40, 4.51)                           | (13, 13, 0)                                       | (41, 41, 0)                                    |
| Israel (2004-2010)             | (4.40, 5.50, 0.50)                            | (25, 36, 3.93)                                    | (11, 16, 1.90)                                 |
| Italy (2004-2010)              | (17.90, 22.10, 1.47)                          | (27, 34, 3.11)                                    | (44, 45, 0.35)                                 |

|                                  |                      |                      |                |
|----------------------------------|----------------------|----------------------|----------------|
| Japan (2004-2010)                | (7.50, 10.70, 1.57)  | (41, 48, 2.80)       | (50, 50, 0)    |
| Jordan (2004-2009)               | (37.7, 104.1, 33.2)  | (25, 35, 5)          | (5, 6, 0.5)    |
| Kazakhstan (2007)                | (7, 7, 0)            | (30, 30, 0)          | (17, 17, 0)    |
| Korea (2008-2010)                | (14.7, 17.1, 1.09)   | (22, 25, 1.41)       | (35, 35, 0)    |
| Latvia (2005-2010)               | (2.1, 9.3, 2.44)     | (15, 15, 0)          | (25, 25, 0)    |
| Malaysia (2006-2011)             | (15.6, 33.1, 6.81)   | (25, 28, 1.3)        | (8, 11, 1.3)   |
| Mexico (2005-2011)               | (19.3, 29.5, 3.75)   | (28, 32, 1.33)       | (9, 14, 1.79)  |
| Netherlands (2004-2011)          | (5.6, 13.3, 3.54)    | (25, 34, 3.71)       | (52, 52, 0)    |
| New Zealand (2004-2005)          | (0.2, 0.2, 0)        | (33, 33, 0)          | (21, 21, 0)    |
| Norway (2004-2011)               | (1.90, 3.5, 0.56)    | (28, 28, 0)          | (48, 48, 0)    |
| Peru (2004-2011)                 | (17.20, 39.40, 7.64) | (30, 30, 0)          | (13, 13, 0)    |
| Philippines (2006)               | (23.9, 23.9, 0)      | (35, 35, 0)          | (9, 9, 0)      |
| Poland (2004 and 2011)           | (21.2, 21.2, 0.00)   | (19, 27, 4)          | (40, 40, 0)    |
| Portugal (2004-2010)             | (6.40, 12, 2.37)     | (27, 33, 2.83)       | (42, 42, 0)    |
| Romania (2007-2011)              | (2.80, 10.90, 2.91)  | (16, 16, 0)          | (16, 16, 0)    |
| Russia (2006-2011)               | (1.80, 10.90, 2.95)  | (20, 24, 2)          | (13, 13, 0)    |
| Singapore (2004-2011)            | (0.90, 1.00, 0.04)   | (17, 22, 1.79)       | (21, 21, 0)    |
| Slovenia (2004-2010)             | (0.00, 14.80, 5.61)  | (20, 25, 1.93)       | (26, 30, 1.31) |
| South Africa (2004-2011)         | (5.90, 9.70, 1.53)   | (34.50, 37.80, 1.38) | (40, 40, 0)    |
| Spain (2004-2011)                | (5.50, 8.20, 0.79)   | (30, 35, 2.32)       | (43, 45, 0.71) |
| Sweden (2004-2011)               | (0.60, 0.70, 0.04)   | (26, 28, 0.94)       | (29, 29, 0)    |
| Switzerland (2005-2011)          | (2, 8.60, 3.18)      | (21, 21, 0)          | (40, 40, 0)    |
| Taiwan (2010)                    | (5.9, 5.9, 0)        | (20, 20, 0)          | (6, 6, 0)      |
| Thailand (2005-2011)             | (7.70, 8.30, 0.22)   | (30, 30, 0)          | (5, 5, 0)      |
| Turkey (2006-2010)               | (14.20, 27.40, 5.29) | (20, 20, 0)          | (28, 30, 0.83) |
| UK (2004-2011)                   | (0.70, 3.20, 1)      | (28, 30, 1)          | (40, 50, 4.33) |
| United Arab Emirates (2006-2009) | (5.50, 15.80, 4.35)  | (55, 55, 0)          | (1, 1, 0)      |
| United States (2004-2011)        | (0.70, 0.80, 0.04)   | (35, 35, 0)          | (25, 25, 0)    |
| Venezuela (2005-2009)            | (25.40, 37.90, 5.59) | (34, 34, 0)          | (5, 6, 0.47)   |

**Table A.3.** Descriptive statistics and correlation matrix (individual level variables)

|                                      | Mean  | SD    | 1     | 2     | 3     | 4     | 5     | 6     | 7     | 8     | 9     | 10    | 11    | 12    | 13    |
|--------------------------------------|-------|-------|-------|-------|-------|-------|-------|-------|-------|-------|-------|-------|-------|-------|-------|
| 1. Innovative entrepreneur           | 0.18  | 0.39  |       |       |       |       |       |       |       |       |       |       |       |       |       |
| 2. High level of education           | 0.49  | 0.50  | 0.05  |       |       |       |       |       |       |       |       |       |       |       |       |
| 3. Entrepreneurial networks          | 0.37  | 0.48  | 0.01  | -0.01 |       |       |       |       |       |       |       |       |       |       |       |
| 4. Perceived entrepreneurial skills  | 0.49  | 0.50  | 0.01  | -0.06 | 0.18  |       |       |       |       |       |       |       |       |       |       |
| 5. Prior entrepreneurship experience | 0.03  | 0.18  | 0.02  | -0.02 | 0.07  | 0.06  |       |       |       |       |       |       |       |       |       |
| 6. Established business ownership    | 0.08  | 0.28  | 0.02  | 0.02  | 0.04  | 0.04  | 0.03  |       |       |       |       |       |       |       |       |
| 7. Age                               | 43.23 | 26.63 | 0.002 | 0.05  | -0.07 | -0.02 | -0.01 | 0.02  |       |       |       |       |       |       |       |
| 8. Male                              | 0.49  | 0.50  | 0.001 | 0.002 | 0.10  | 0.11  | 0.03  | 0.04  | -0.02 |       |       |       |       |       |       |
| <i>Country level variables</i>       |       |       |       |       |       |       |       |       |       |       |       |       |       |       |       |
| 9. Start-up costs                    | 8.60  | 11.00 | 0.08  | -0.05 | 0.03  | -0.01 | 0.05  | 0.01  | -0.05 | -0.02 |       |       |       |       |       |
| 10. Corporate tax rate (log)         | 3.29  | 0.68  | -0.05 | -0.03 | -0.03 | -0.01 | -0.03 | 0.02  | 0.02  | -0.04 | 0.04  |       |       |       |       |
| 11. Personal income tax rate (log)   | 3.44  | 0.57  | -0.07 | 0.02  | -0.05 | 0.03  | -0.08 | 0.01  | 0.04  | 0.02  | -0.47 | 0.48  |       |       |       |
| 12. Air transport (log)              | 17.13 | 1.45  | -0.07 | 0.04  | -0.08 | -0.02 | -0.03 | 0.02  | 0.06  | -0.01 | -0.29 | 0.13  | 0.38  |       |       |
| 13. GDP per capita (log)             | 10.05 | 3.58  | -0.07 | 0.14  | -0.04 | 0.04  | -0.10 | 0.02  | 0.08  | 0.06  | -0.65 | -0.07 | 0.49  | 0.29  |       |
| 14. GDP growth                       | 2.64  | 0.83  | 0.06  | -0.05 | 0.03  | -0.04 | 0.06  | -0.01 | -0.04 | -0.03 | 0.32  | 0.11  | -0.26 | -0.12 | -0.50 |

If the absolute value is larger than 0.026, the correlation is significant at 5% level.

Number of observations = 43,223

**Table A.4.** Descriptive statistics and correlation matrix (country level variables)

|                                         | Mean  | SD    | 1     | 2     | 3     | 4     | 5     |
|-----------------------------------------|-------|-------|-------|-------|-------|-------|-------|
| 1. Share of innovative entrepreneurship | 0.16  | 0.89  |       |       |       |       |       |
| 2. Start-up costs                       | 10.97 | 13.74 | 0.18  |       |       |       |       |
| 3. Corporate tax rate (log)             | 3.28  | 0.29  | 0.06  | 0.10  |       |       |       |
| 4. Personal income tax rate (log)       | 3.26  | 0.70  | -0.26 | -0.32 | -0.06 |       |       |
| 5. GDP per capita (log)                 | 9.86  | 0.98  | -0.14 | -0.60 | 0.02  | 0.41  |       |
| 6. GDP growth                           | 3.06  | 4.08  | 0.11  | 0.25  | 0.08  | -0.26 | -0.40 |

If the absolute value is larger than 0.026, the correlation is significant at 5% level.

Number of observations = 276

**Table A.5.** Robustness checks - inclusion of additional control variables in individual-level regressions

|    | Paper                        | Control variables                                                                                               | Coefficients                                                                       |
|----|------------------------------|-----------------------------------------------------------------------------------------------------------------|------------------------------------------------------------------------------------|
| 1  | Autio et al. (2013)          | Population (million)                                                                                            | Startup costs (0.007**), Corporate tax rate (-0.043*), Income tax rate (-0.052)    |
| 2  | Stephan and Uhlaner (2010)   | GDP (log)                                                                                                       | Startup costs (0.006***), Corporate tax rate (-0.042**), Income tax rate (-0.010)  |
| 3  | Levie and Autio (2011)       | GDP per capita squared                                                                                          | Startup costs (0.005*), Corporate tax rate (-0.061), Income tax rate (-0.027)      |
| 4  | Levie and Autio (2011)       | Population growth                                                                                               | Startup costs (0.005**), Corporate tax rate (-0.014), Income tax rate (-0.010)     |
| 5  | Dheer (2017)                 | Unemployment rate                                                                                               | Startup costs (0.006**), Corporate tax rate (-0.038), Income tax rate (-0.006)     |
| 6  | Anokhin and Schulze (2009)   | Log of population                                                                                               | Startup costs (0.007**), Corporate tax rate (-0.040*), Income tax rate (-0.044)    |
| 7  | Dutta and Sobel (2016)       | Labor force participation (total)                                                                               | Startup costs (0.008**), Corporate tax rate (-0.019), Income tax rate (-0.055)     |
| 8  | Li et al. (in press)         | Degree of economic freedom                                                                                      | Startup costs (0.008***), Corporate tax rate (-0.067***), Income tax rate (-0.022) |
| 9  | Li et al. (in press)         | the presence of foreign-owned enterprises (FDI/GDP)                                                             | Startup costs (0.005***), Corporate tax rate (-0.061***), Income tax rate (-0.022) |
| 10 | Mrozewski and Kratzer (2017) | general quality of the institutional environment: a country's position in the World Bank doing business ranking | Startup costs (0.006**), Corporate tax rate (-0.058**), Income tax rate (-0.031)   |
| 11 | Van Stel et al. (2007)       | Insolvency costs                                                                                                | Startup costs (0.005**), Corporate tax rate (-0.056**), Income tax rate (-0.041)   |
| 12 | Thai and Turkina (2014)      | Informal entrepreneurial activity                                                                               | Startup costs (0.003), Corporate tax rate (-0.056***), Income tax rate (-0.017)    |

**Table A.6.** Robustness checks – multi-level regressions

|                                           | Coeff.<br>(standard<br>error) | Coeff.<br>(standard<br>error) | Coeff.<br>(standard<br>error) |
|-------------------------------------------|-------------------------------|-------------------------------|-------------------------------|
| <b>Country level variables</b>            |                               |                               |                               |
| Start-up costs                            | 0.015***<br>(0.003)           |                               |                               |
| Corporate tax rate (log)                  |                               | -0.099***<br>(0.017)          |                               |
| Income tax rate (log)                     |                               |                               | -0.181**<br>(0.085)           |
| GDP per capita (log)                      | 0.178**<br>(0.070)            | -0.098<br>(0.068)             | -0.027<br>(0.072)             |
| GDP growth rate                           | 0.032***<br>(0.008)           | 0.026<br>(0.023)              | 0.027<br>(0.18)               |
| <b>Individual level control variables</b> |                               |                               |                               |
| High level of education                   | 0.114***<br>(0.028)           | 0.151***<br>(0.054)           | 0.145***<br>(0.052)           |
| Entrepreneurial networks                  | 0.076***<br>(0.028)           | 0.066*<br>(0.035)             | 0.062*<br>(0.035)             |
| Perceived entrepreneurial skills          | 0.195***<br>(0.040)           | 0.274***<br>(0.069)           | 0.276***<br>(0.069)           |
| Gender (male=1)                           | 0.004<br>(0.027)              | 0.004<br>(0.043)              | 0.012<br>(0.044)              |
| Age                                       | -0.001<br>(0.001)             | -0.001<br>(0.001)             | -0.001<br>(0.002)             |
| Age-square                                | 0.000<br>(0.000)              | 0.000<br>(0.000)              | 0.000<br>(0.000)              |
| Established business ownership            | 0.268***<br>(0.051)           | 0.329***<br>(0.079)           | 0.325***<br>(0.071)           |
| Prior entrepreneurship experience         | 0.068<br>(0.043)              | 0.088*<br>(0.051)             | 0.089*<br>(0.051)             |
| Industry dummies                          | Yes                           | Yes                           | Yes                           |
| Year dummies                              | Yes                           | Yes                           | Yes                           |
| Constant                                  | -4.432***<br>(0.699)          | -1.176<br>(0.802)             | -1.596**<br>(0.759)           |
| Sample size                               | 45,111                        | 45,111                        | 45,111                        |

## References

- Anokhin, S., & Schulze, W. S. (2009). Entrepreneurship, Innovation, and Corruption. *Journal of Business Venturing*, 24(5), 465-476. doi: 10.1016/j.jbusvent.2008.06.001
- Autio, E., Pathak, S., & Wennberg, K. (2013). Consequences of cultural practices for entrepreneurial behaviors. *Journal of International Business Studies*, 44(4), 334-362. doi: 10.1057/jibs.2013.15
- Dheer, R. J. S. (2017). Cross-national differences in entrepreneurial activity: Role of culture and institutional factors. *Small Business Economics*, 48(4), 813-842. doi: 10.1007/s11187-016-9816-8
- Dutta, N., & Sobel, R. (2016). Does corruption ever help entrepreneurship? *Small Business Economics*, 47(1), 179-199. doi: 10.1007/s11187-016-9728-7
- Levie, J., & Autio, E. (2011). Regulatory burden, rule of law and entry of strategic entrepreneurs: An international panel study. *Journal of Management Studies*, 48(6), 1392-1419. doi: 10.1111/j.1467-6486.2010.01006.x
- Li, C., Isidor, R., Dau, L. A., & Kabst, R. (in press). The more the merrier? Immigrant share and entrepreneurial activities. *Entrepreneurship Theory and Practice*. doi: 10.1111/etap.12277
- Mrozewski, M., & Kratzer, J. (2017). Entrepreneurship and country-level innovation: Investigating the role of entrepreneurial opportunities. *The Journal of Technology Transfer*, 42(5), 1125-1142. doi: 10.1007/s10961-016-9479-2
- Stephan, U., & Uhlaner, L. (2010). Performance-based vs socially supportive culture: A cross-national study of descriptive norms and entrepreneurship. *Journal of International Business Studies*, 41(8), 1347-1364. doi: 10.1057/jibs.2010.14
- Thai, M. T. T., & Turkina, E. (2014). Macro-level determinants of formal entrepreneurship versus informal entrepreneurship. *Journal of Business Venturing*, 29(4), 490-510. doi: 10.1016/j.jbusvent.2013.07.005
- Van Stel, A., Storey, D. J., & Thurik, A. R. (2007). The effect of business regulations on nascent and young business entrepreneurship. *Small Business Economics*, 28(2), 171-186. doi: 10.1007/s11187-006-9014-1
